# Supplementary figures and images for: Mononuclear non-heme iron(iii) peroxide complexes: syntheses, characterisation, mass spectrometric and kinetic studies
Source: Royal Society of Chemistry journal article supplement (doi:10.1039/b103844n), 2002-01-01

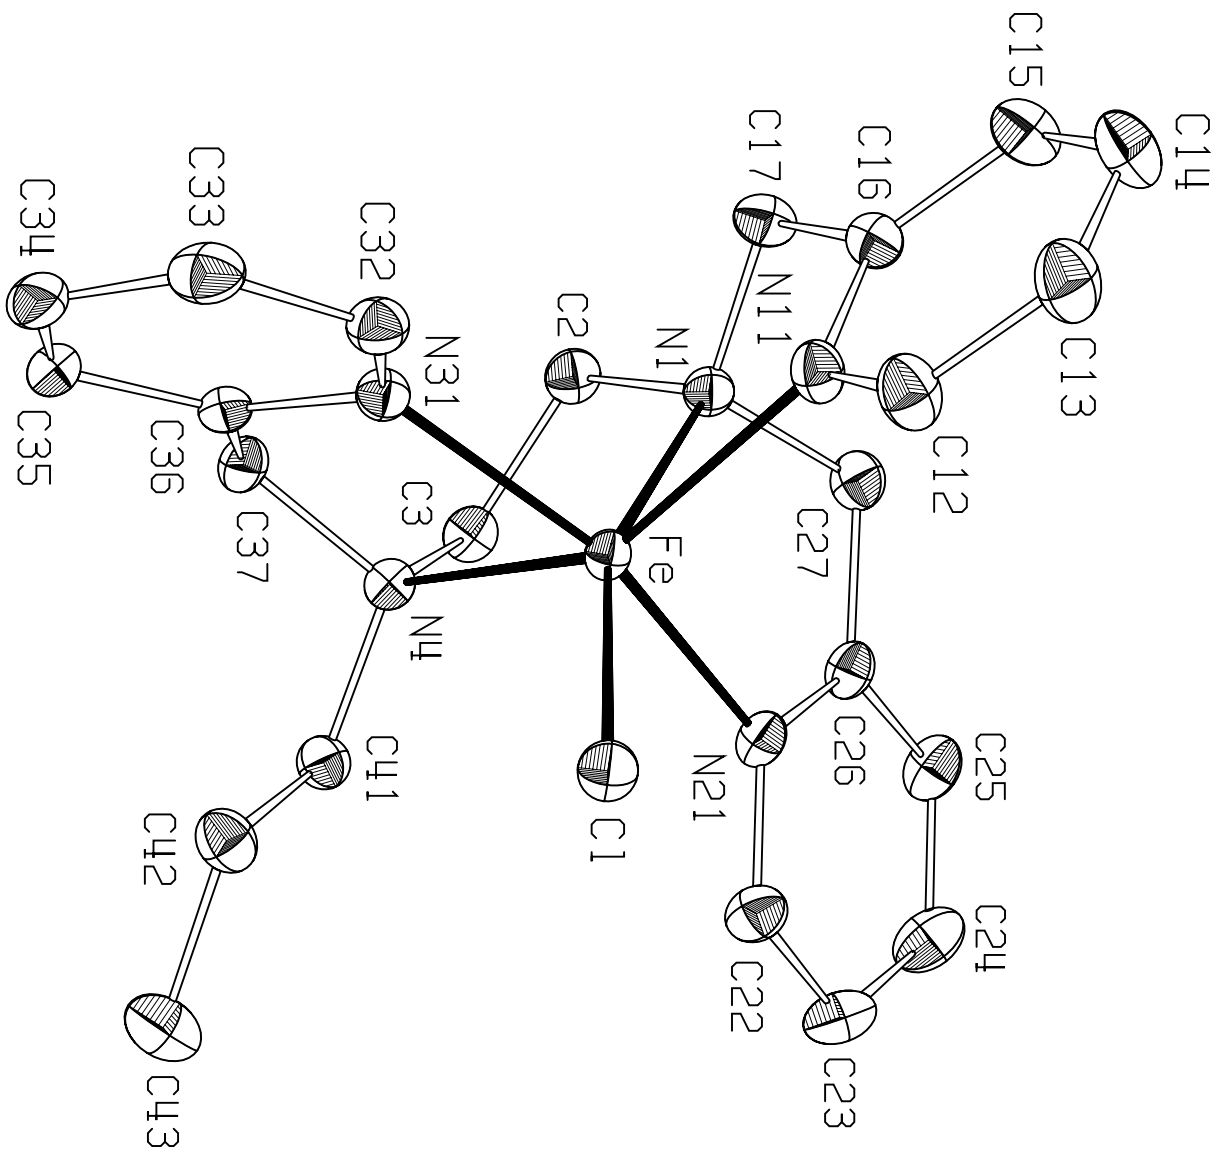

Supplement: f1.pdf [file f1.pdf]

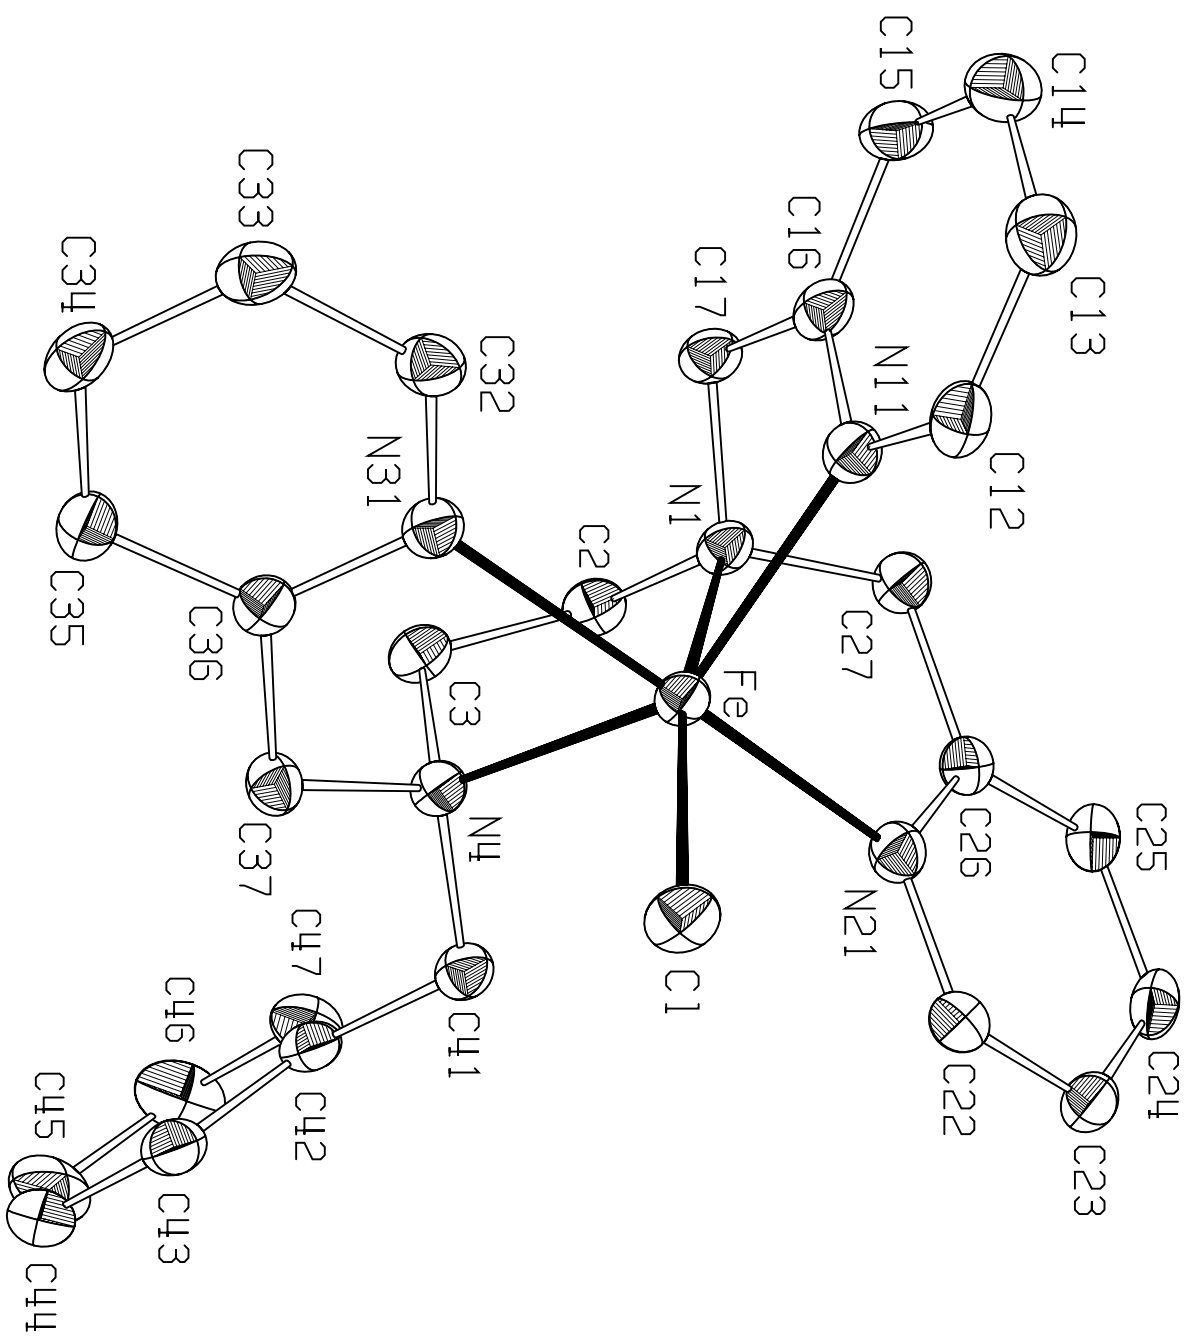

Supplement: f2.pdf [file f2.pdf]

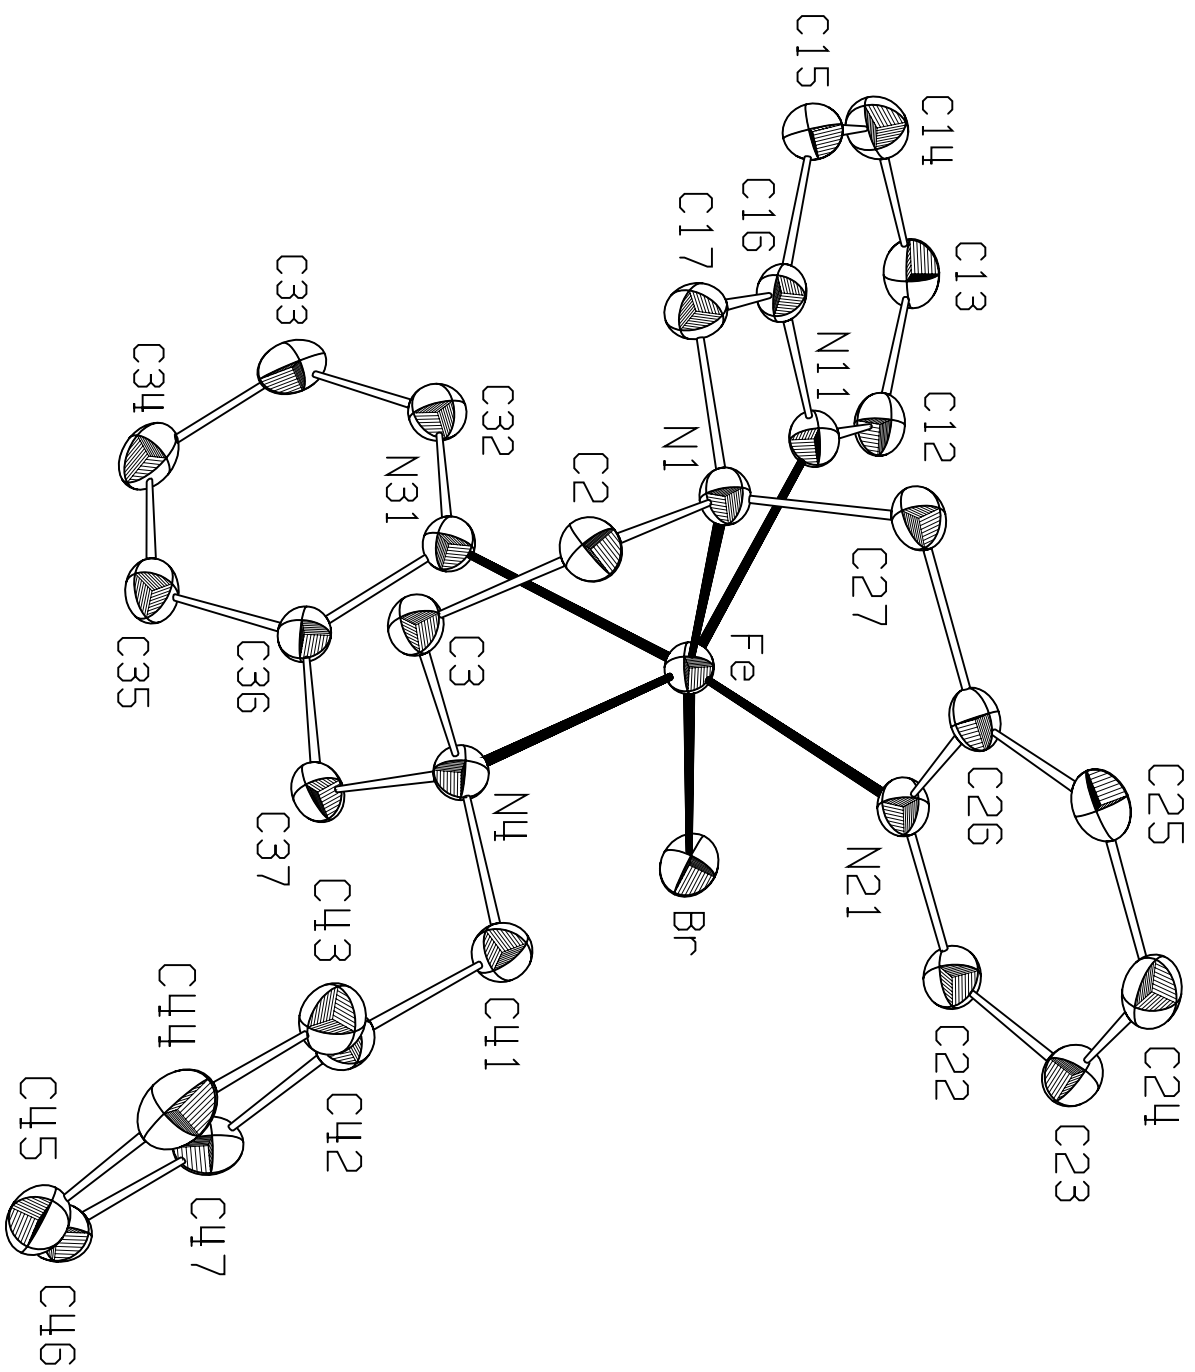

Supplement: f3.pdf [file f3.pdf]
